# Supplementary material for: Vivid colours in hyperuniform complex-index photonic structures by resonant interference of photonic band gaps and optical band gaps
Source: Royal Society of Chemistry journal article supplement (doi:10.1039/c8ra07363e), 2018-01-01
Supplement: c8ra07363e1.pdf [file c8ra07363e1.pdf]

## Supporting Information

### **Vivid Colours in Hyperuniform Complex-Index Photonic Structures by Resonant Interference of Photonic Band Gaps and Optical Band Gaps**

Chunhee Seo<sup>a</sup>, Jinho Hyon<sup>a,b</sup>, Soyeon Suk<sup>a</sup>, Changjoon Oh<sup>a</sup>, Jihye Nam<sup>a</sup>, Duong Nguyen Minh<sup>a</sup>, Jae Hyun Sim<sup>a</sup> and Youngjong Kang<sup>a,c\*</sup>

<sup>a</sup> Department of Chemistry, Hanyang University, 222 Wangsimni-Ro, Seongdong-Gu, Seoul, 04763, Korea

<sup>b</sup> Materials Science and Nanoengineering, Rice University, 6100 Main St., Houston, TX 77005, USA

<sup>c</sup> Research Institute for Natural Sciences, Institute of Nano Science and Technology, Hanyang University, 222 Wangsimni-Ro, Seongdong-Gu, Seoul, 04763, Korea

**E-mail:** [youngjkang@hanyang.ac.kr](mailto:youngjkang@hanyang.ac.kr)

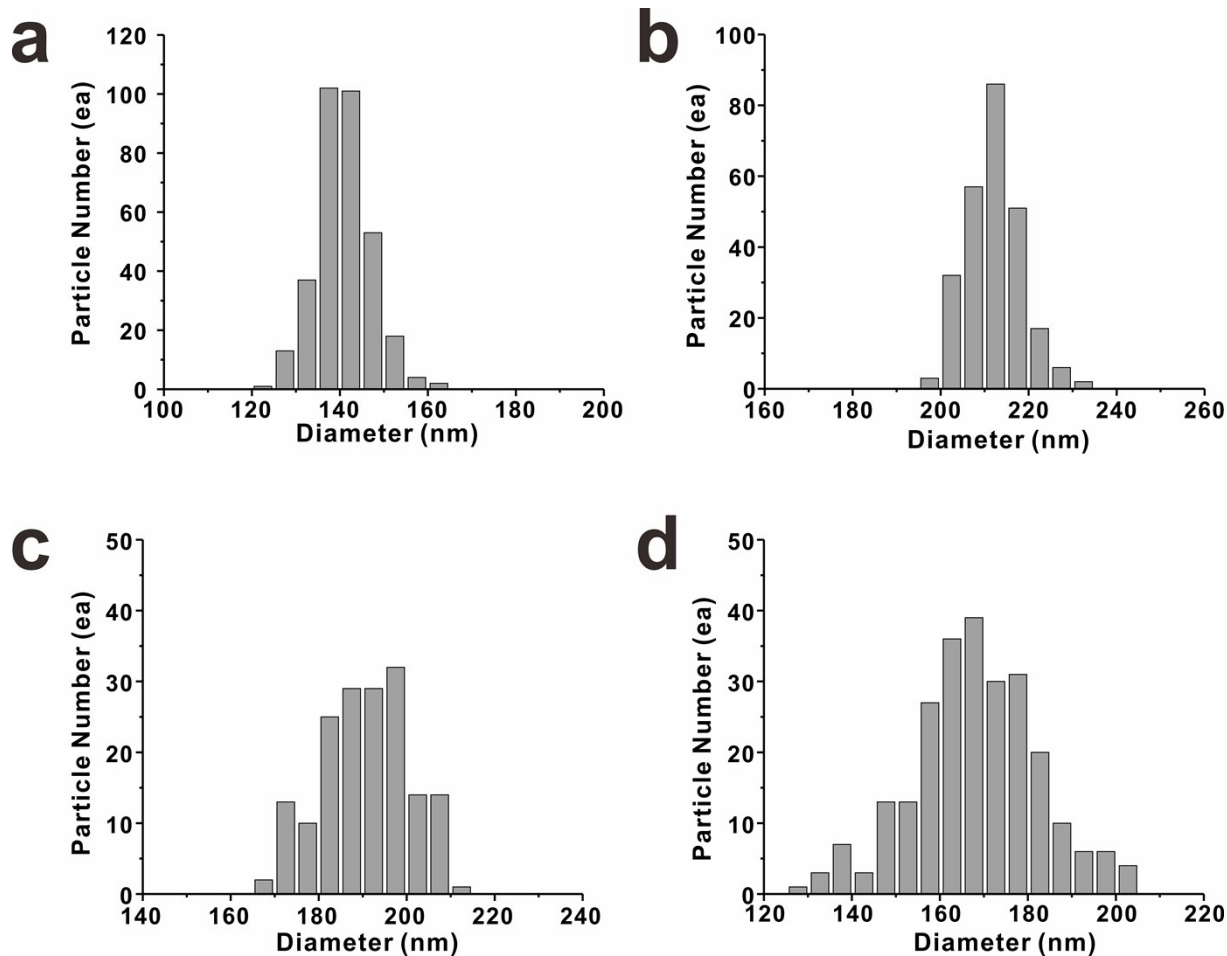

**Figure S1.** Histograms of nanoparticles used for preparing HPSs and dopants. Polydispersity index (PDI) of particles is defined as  $PDI = \langle d^2 \rangle / \langle d \rangle^2$ . a) SiO<sub>2</sub> nanoparticles ( $d_{SiO_2} = 141 \pm 6$  nm, PD = 1.002), b) SiO<sub>2</sub> nanoparticles ( $d_{SiO_2} = 212 \pm 6$  nm, PDI = 1.0009), c) PS<sub>SD-I</sub> and PS<sub>SDB-II</sub> ( $d = 190 \pm 10$  nm, 1.0002) and d) PDA nanoparticles ( $d_{PDA} = 172 \pm 16$  nm, PDI = 1.009).

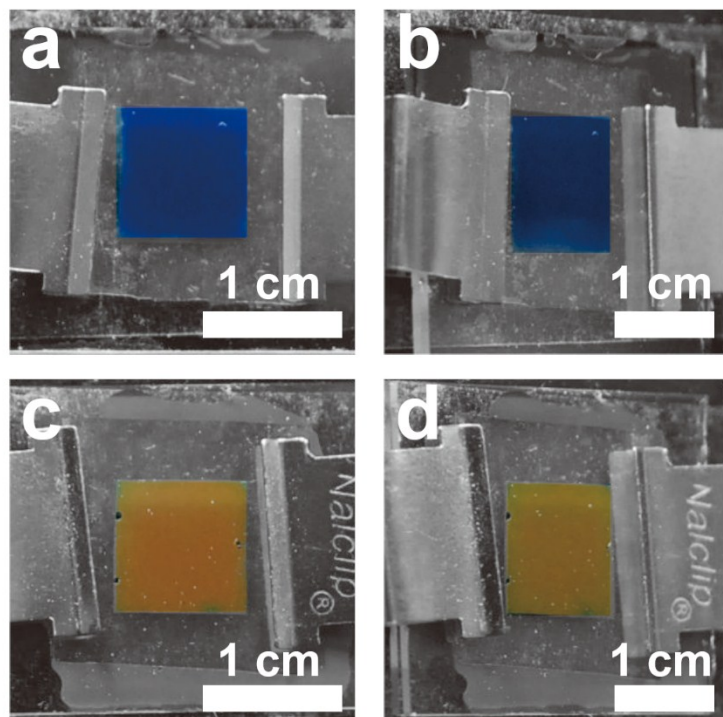

**Figure S2.** HPSs doped with PDA showing angle-independent photonic colors. Photo images of blue HPS ( $d = 159 \pm 9$  nm) at a) normal angle and b)  $60^\circ$ . Photo images of red HPS ( $d = 199 \pm 9$  nm) at a) normal angle and b)  $60^\circ$ .

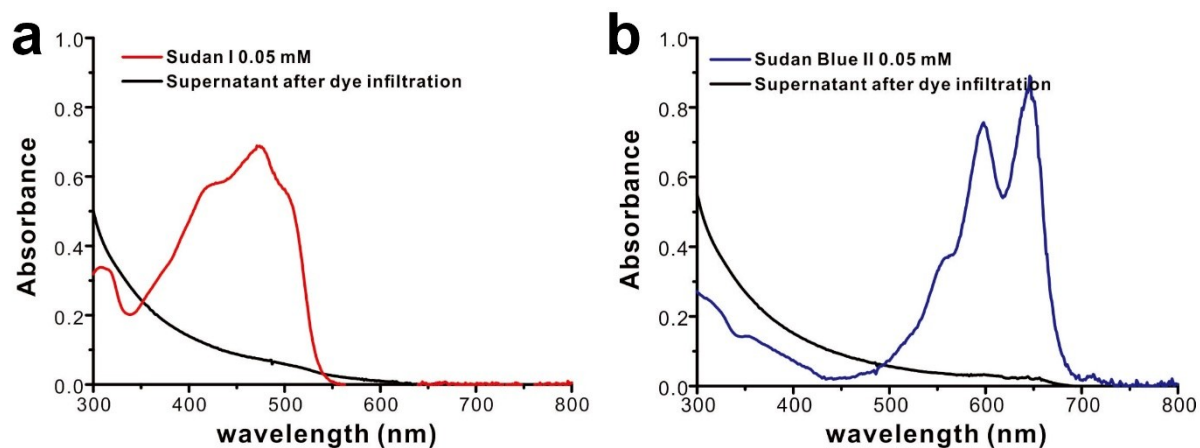

**Figure S3.** UV-Vis spectra of before and after dye-infiltration in PS nanoparticles. Based on the absorbance changes, the concentrations of Sudan I and Sudan blue II infiltrated in PS nanoparticles were calculated

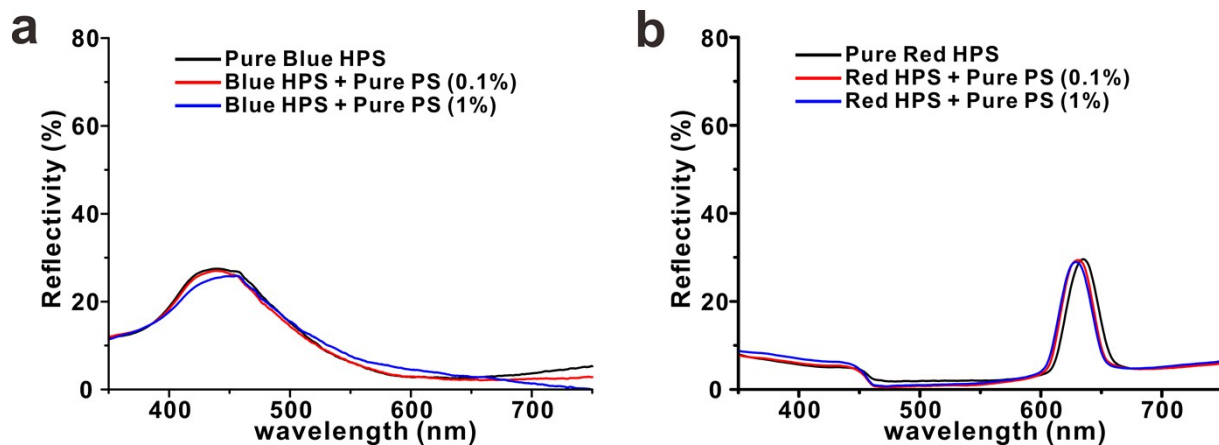

**Figure S4.** Effects of doping HPS with pure PS nanoparticles. Unlike HPSs doped with dye-infiltrated PS nanoparticles, both blue and red HPSs didn't show reflectivity change at all when pure PS nanoparticles were used as dopants.

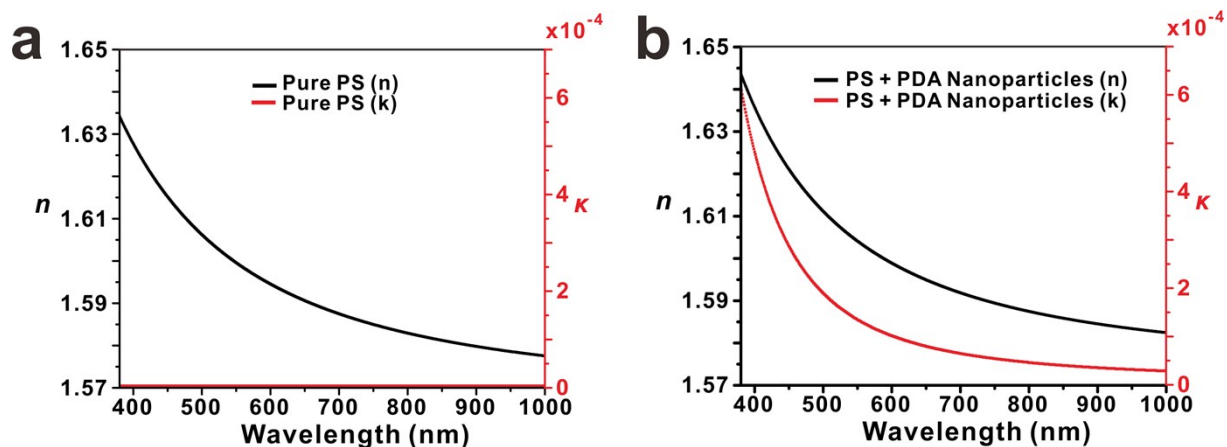

**Figure S5.** Complex refractive index of a) polystyrene film, and b) PDA nanoparticles embedded in polystyrene films. When PDA nanoparticles were added by 1 wt% to the polystyrene, there was no significant change in the real part of the refractive index of polystyrene. This result shows that doping with a small amount of complex refractive index materials does not affect the real part of the refractive index.

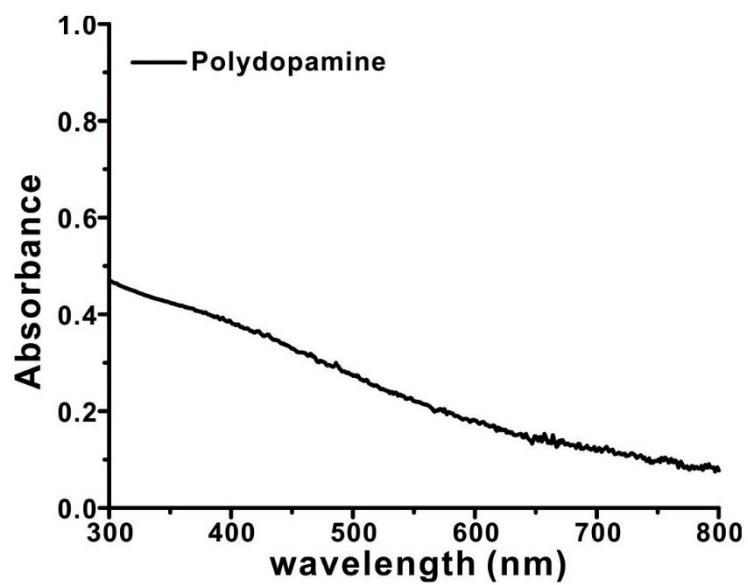

**Figure S6.** Absorbance spectrum of a colloidal PDA nanoparticle solution.
